# Supplementary material for: Synthesis of boron and phosphorus codoped all-inorganic colloidal silicon nanocrystals from hydrogen silsesquioxane
Source: Royal Society of Chemistry journal article supplement (doi:10.1039/c4nr03857f), 2014-01-01
Supplement: c4nr03857f1.pdf [file c4nr03857f1.pdf]

## Supporting Information

# Synthesis of Boron and Phosphorus Codoped All-Inorganic Colloidal Silicon Nanocrystals from Hydrogen Silsesquioxane

H. Sugimoto,<sup>a</sup> K. Imakita<sup>b</sup> and M. Fujii<sup>c</sup>

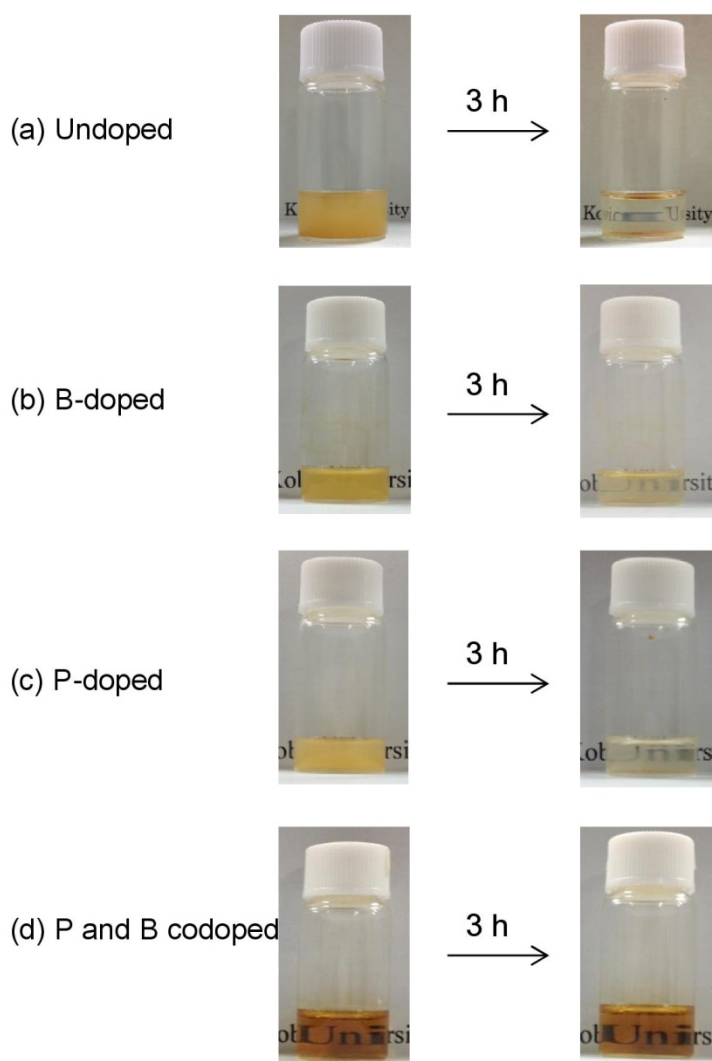

**Figure S1.** Photographs of methanol containing (a) undoped, (b) B- or (c) P-singly doped and (d) codoped Si NCs. Left: Just after shaking vigorously, Right: 3 hours after preparation.

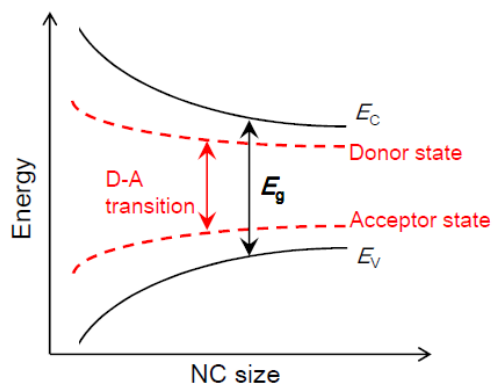

**Figure S2.** Energy level diagram of donor and acceptor codoped Si NCs as a function of their size.

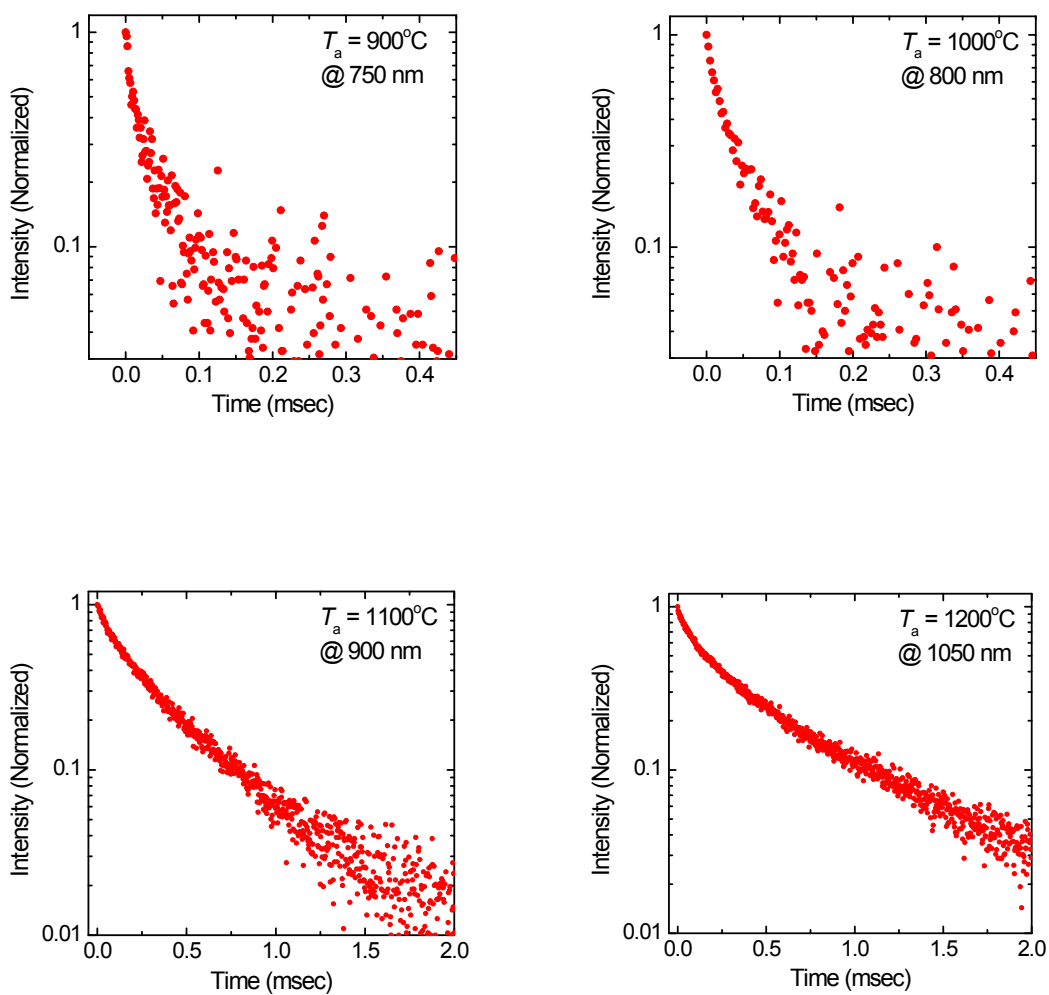

**Figure S3.** Photoluminescence decay curves of codoped Si NCs grown at 900 to 1200°C.
